# Supplementary material for: Low temperature hydrogen generation from ammonia combined with lithium borohydride
Source: Royal Society of Chemistry journal article supplement (doi:10.1039/b916503g), 2009-01-01
Supplement: b916503g.pdf [file b916503g.pdf]

***Electronic Supplementary Information***

**Low temperature hydrogen generation from ammonia combined with  
Lithium borohydride**

*Liang Gao, Yan Hui Guo, Guang Lin Xia, Xue Bin Yu \**

*Department of Chemistry, Fudan University, Shanghai, China,  
E-mail: yuxuebin@fudan.edu.cn*

## **Experimental Section**

The source materials, namely, anhydrous magnesium chloride ( $\text{MgCl}_2$ ) and lithium boron hydride ( $\text{LiBH}_4$ ) were obtained commercially. To prevent materials weight gaining due to moisture, a series of operation during sample preparation was performed under anhydrous condition.  $\text{Mg}(\text{NH}_3)_n\text{Cl}_2$  (here  $n=1, 2$  and  $6$ ) was prepared according to previous literatures. In order to understand what kind of role the anion  $\text{BH}_4$  plays in dehydrogenation process, the mixture of  $\text{Mg}(\text{NH}_3)_n\text{Cl}_2-n\text{LiBH}_4$  (here  $n=1, 2$  and  $6$ ) were loaded into different milling vessels under argon atmosphere. The typical weight is 1.5g-2g. The balling is conducted at 580 rpm for 6 min.

The phrases of all these samples as milled for 6 min and ones after heat treatment at different typical temperatures were shown by XRD patterns. All samples were mounted in a glove box and amorphous polymer tapes were used to cover the surface of samples to avoid oxidation during the XRD measurement. Hydrogen and ammonia release measurement was performed by TG-MS with a heating rate of  $10^\circ\text{C min}^{-1}$  under 1 bar argon and a carrier of flow  $200\text{ cm}^3\text{ min}^{-1}$ . The typical sample quantities were 5-15 mg. Heat treatments of  $\text{Mg}(\text{NH}_3)\text{Cl}_2-\text{LiBH}_4$  mixtures were carried out in a close test tube under an argon atmosphere, and hydrogen was released into a carrier stream of argon through a T-joint with a thin connection tube to maintain the argon atmosphere over the samples. The products after heat treatment were also characterized at RT by the  $^{11}\text{B}$  NMR performed (DSX 300) using a Doty CP-MAS probe with no probe background. All of those solid samples were spun at 12 kHz, using 4mm  $\text{ZrO}_2$  rotors filled up in purified argon atmosphere glove boxes. A  $0.55\text{ }\mu\text{s}$  single-pulse excitation was employed, with repetition times of 1.5 s. Sample I and those after heat treatments at different temperature were characterized by infrared absorption spectroscopy using a Nicolet Nexus 470 FT-IR spectrometer and KBr pellets. Due to the high reactivity of these compounds with moisture and oxygen, all of the samples are loaded into one tube with  $\text{CaF}_2$  windows. The temperature-programmed desorption (TPD) was performed on a semi-automatic Sievert's apparatus, connected with a reactor filled with sample under hydrogen atmosphere (1bar). The reactor connected with a chamber of known volume was heated from RT to  $480^\circ\text{C}$  at a  $10^\circ\text{C min}^{-1}$  heating rate.

**Table S1.** Summary of H<sub>2</sub> and NH<sub>3</sub> content and NH<sub>3</sub> conversion ratio in the samples of Mg(NH<sub>3</sub>)<sub>n</sub>Cl<sub>2</sub> · nLiBH<sub>4</sub> (n=1, 2, and 6).

| Sample                                                                | Gravimetric NH <sub>3</sub> , wt. % | Gravimetric H wt. % | The results of TG wt. %                  | n(H <sub>2</sub> )/sample, mole <sup>[c]</sup> | n(NH <sub>3</sub> )/sample, mole <sup>[c]</sup> | Converted NH <sub>3</sub> , wt. % |
|-----------------------------------------------------------------------|-------------------------------------|---------------------|------------------------------------------|------------------------------------------------|-------------------------------------------------|-----------------------------------|
| Mg(NH <sub>3</sub> ) <sub>6</sub> Cl <sub>2</sub> ·6LiBH <sub>4</sub> | 31.1                                | 12.8                | 15.2 <sup>[a]</sup> /20.1 <sup>[b]</sup> | 10.5                                           | 1.6                                             | 72.4                              |
| Mg(NH <sub>3</sub> ) <sub>2</sub> Cl <sub>2</sub> ·2LiBH <sub>4</sub> | 19.7                                | 8.1                 | 11 <sup>[a]</sup> /12 <sup>[b]</sup>     | 5.1                                            | 0.4                                             | 78.9                              |
| Mg(NH <sub>3</sub> )Cl <sub>2</sub> ·LiBH <sub>4</sub>                | 12.7                                | 5.2                 | 5.2 <sup>[a]</sup> /6.2 <sup>[b]</sup>   | 2.9                                            | 0.08                                            | 91.6                              |

[a] after heating to 275 °C; [b] after heating to 550 °C; [c] calculated according to the TG results heating to 275 °C and the TPD results performed under hydrogen atmosphere(1 bar) from room temperature to 480 °C.

**Table S2.** Absorption bands detected in IR spectra (wavenumber [ $\text{cm}^{-1}$ ]) of sample I (milled for 6 min) and sample I after heat treatment at different temperatures as compared to the substrates ( $\text{Mg}(\text{NH}_3)\text{Cl}_2$  and  $\text{LiBH}_4$ ).

| Assignment    | Substrates(RT) | Milled and after heat treatment |       |       |       |       |
|---------------|----------------|---------------------------------|-------|-------|-------|-------|
|               |                | RT                              | 50□   | 150□  | 200□  | 250□  |
| $\nu$ (NH)    | 3349           | 3347                            | 3347  | 3350  | ----- | ----- |
|               | 3275           | 3277                            | 3274  | 3274  | ----- | ----- |
| $\nu$ (BH)    | 2378           | 2378                            | 2378  | 2360  | 2360  | 2360  |
|               | -----          | -----                           | ----- | 2344  | 2344  | ----- |
|               | 2286           | 2286                            | 2286  | 2289  | 2292  | 2292  |
|               | 2219           | 2219                            | 2219  | 2225  | 2228  | 2225  |
| $\delta$ (NH) | 1277           | 1277                            | 1277  | 1277  | ----- | ----- |
|               | 1259           | 1259                            | 1259  | 1259  | ----- | ----- |
|               | 1402           | 1406                            | 1406  | 1405  | 1405  | 1400  |
| $\nu$ (BN)    | -----          | -----                           | ----- | ----- | 1457  | 1457  |
|               |                |                                 |       |       | ----- | 1366  |
|               |                |                                 |       |       | ----- | 1354  |

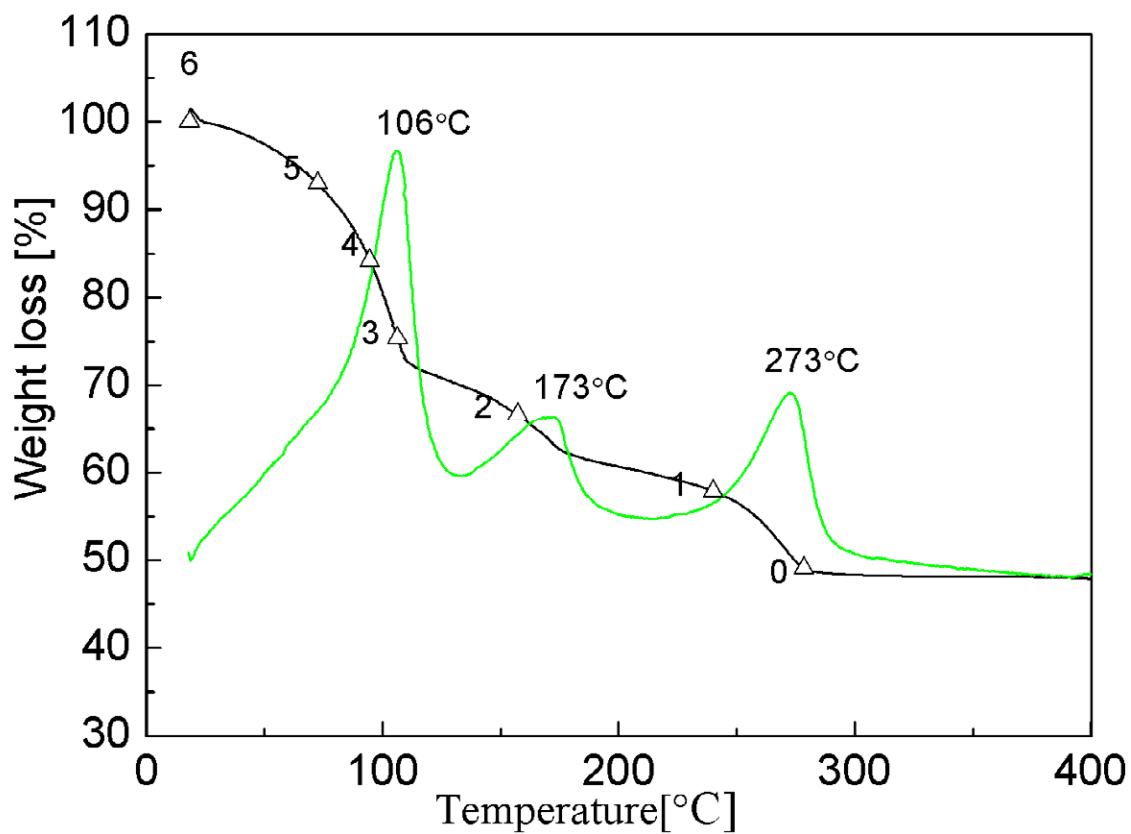

**Figure S1.** The TG (in black line) and DTA (in green line) of  $\text{Mg}(\text{NH}_3)_6\text{Cl}_2$ . The quantity of remaining ammonia is marked with  $\Delta$ .

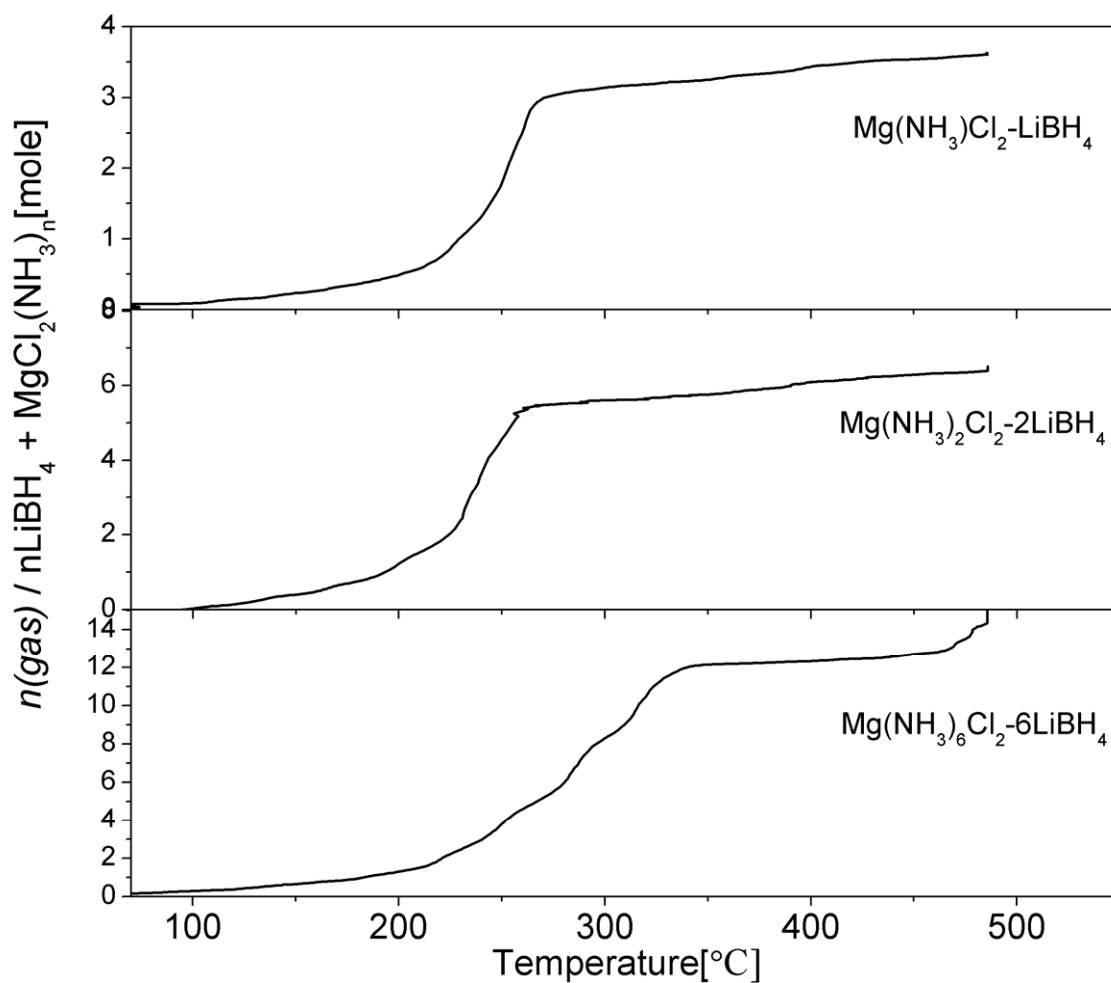

**Figure S2.** TPD results of hydrogen and ammonia release for  $\text{Mg}(\text{NH}_3)\text{Cl}_2\text{-LiBH}_4$ ,  $\text{Mg}(\text{NH}_3)_2\text{Cl}_2\text{-}2\text{LiBH}_4$ ,  $\text{Mg}(\text{NH}_3)_6\text{Cl}_2\text{-}6\text{LiBH}_4$ . The amount of gas released has been normalized as  $n(\text{gas})/\text{mol}$  of  $\text{Mg}(\text{NH}_3)_n\text{Cl}_2\text{-}n\text{LiBH}_4$ .

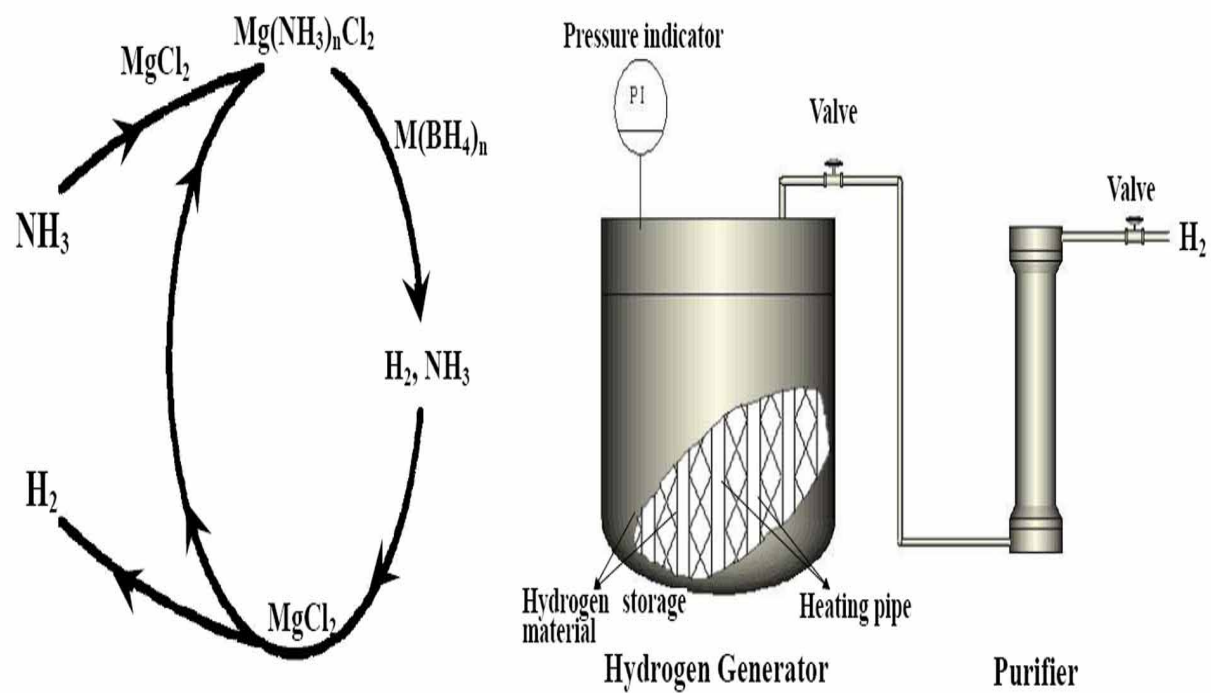

**Figure S3.** The conversion of  $\text{NH}_3$  to  $\text{H}_2$  (left) and one simple purifier to restrain ammonia release (right).

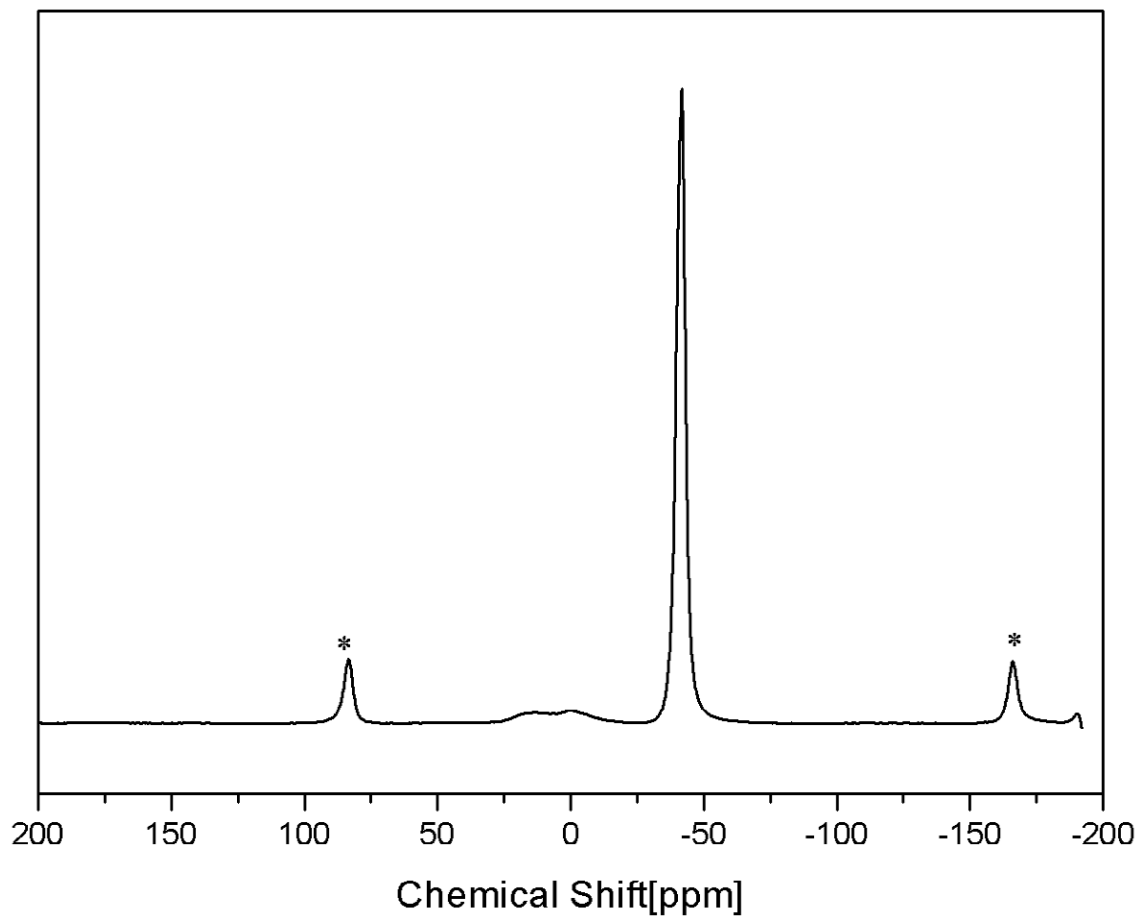

**Figure S4.** The  $^{11}\text{B}$  NMR result of the product of  $\text{LiBH}_4$  heating to  $300^\circ\text{C}$  under pure ammonia atmosphere without  $\text{MgCl}_2$  for 3 h.



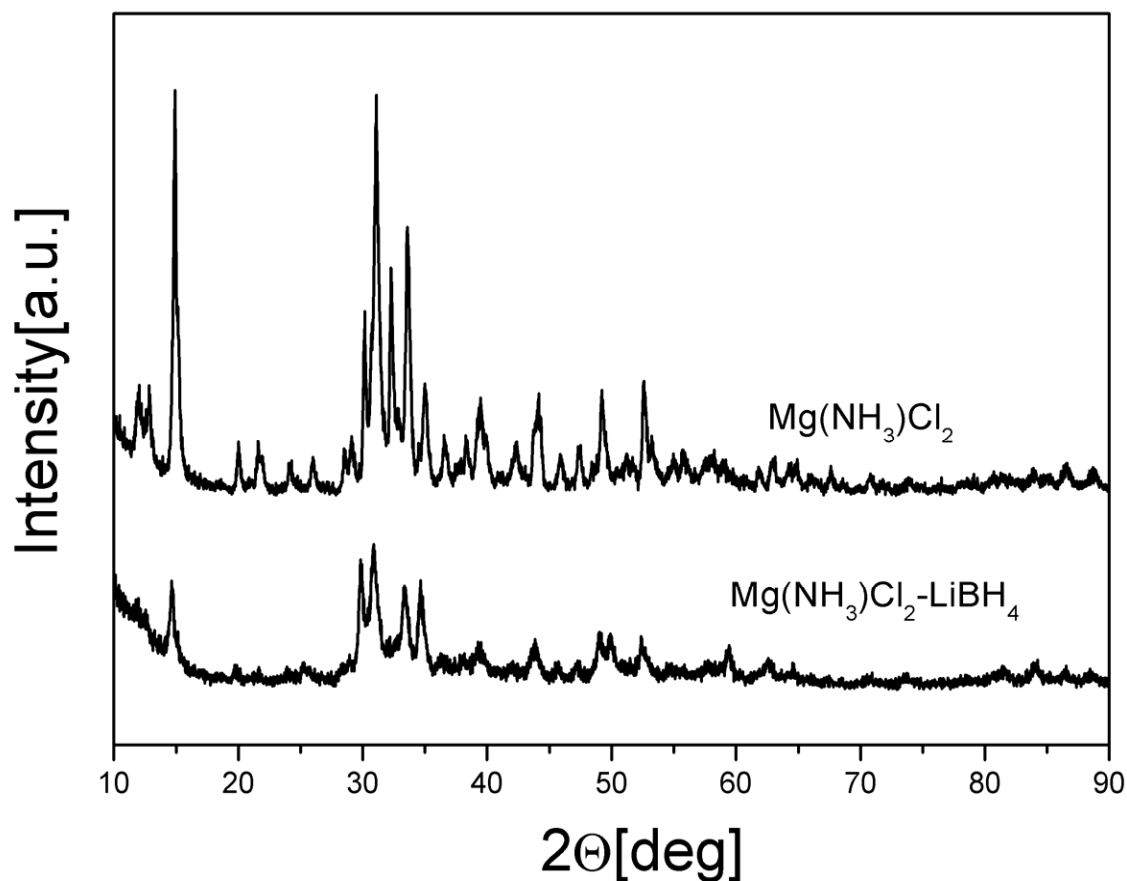

**Figure S5.** The XRD patterns of Mg (NH<sub>3</sub>) Cl<sub>2</sub> and sample I at room temperature . After ball milling, the peaks corresponding to LiBH<sub>4</sub> and Mg(NH<sub>3</sub>)Cl<sub>2</sub> disappeared and new phase, the reflection of which is assigned to the mixture of Mg(NH<sub>3</sub>)Cl<sub>2</sub>—LiBH<sub>4</sub>, appeared.

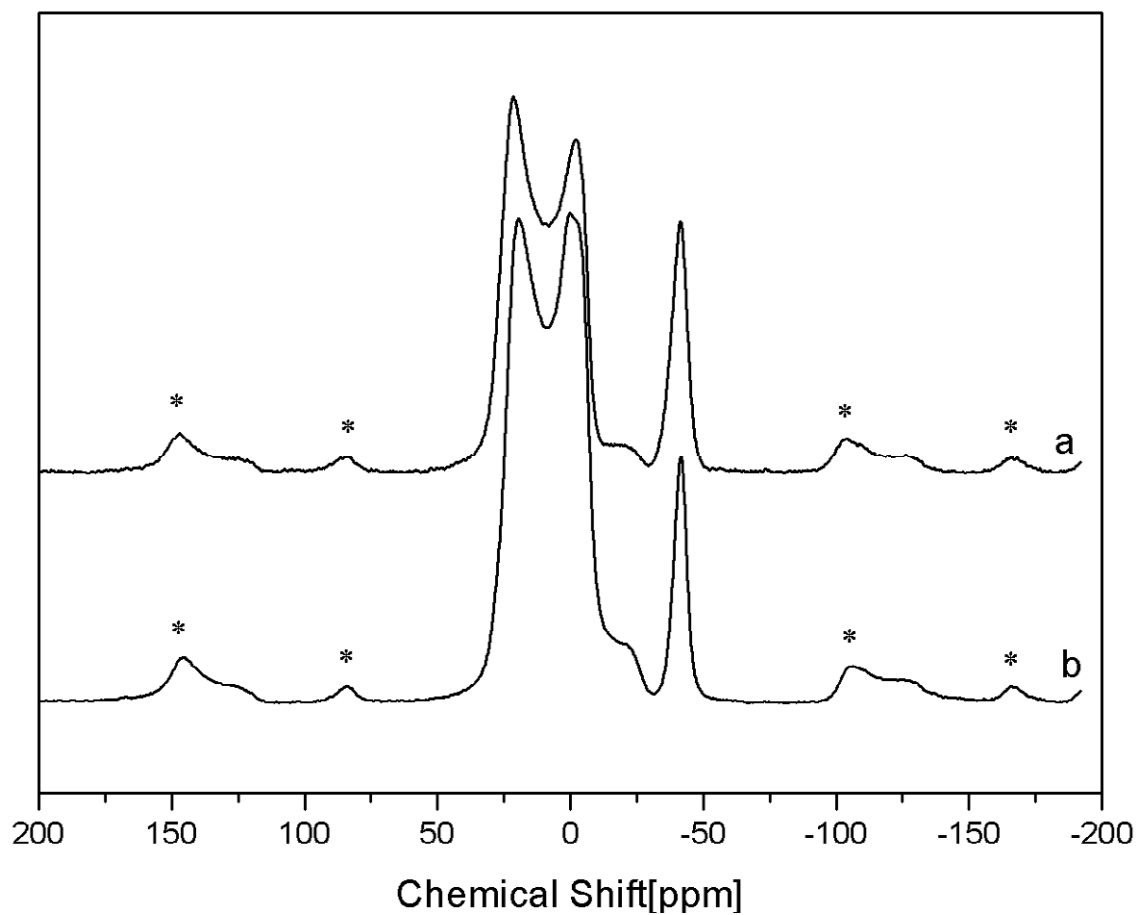

**Figure S6.** The  $^{11}\text{B}$  NMR of a)  $\text{Mg}(\text{NH}_3)\text{Cl}_2\text{—LiBH}_4$  dehydrogenated after heat treatment at  $280^\circ\text{C}$  for 3 hours; b) Lithium amidoborane dehydrogenated after heat treatment at  $250^\circ\text{C}$  for 3h. Spinning side bands are marked with \*

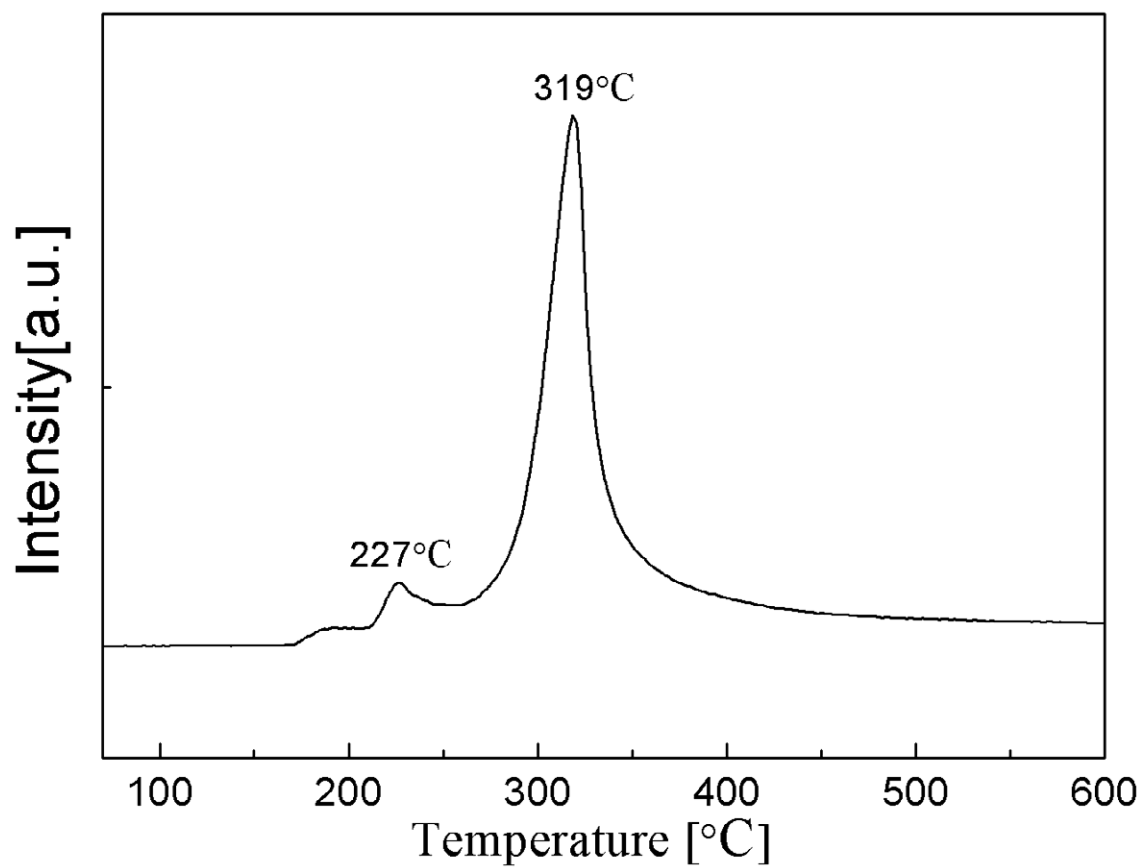

*Figure S7.* MS result of the home made Mg(NH<sub>3</sub>)Cl<sub>2</sub>.

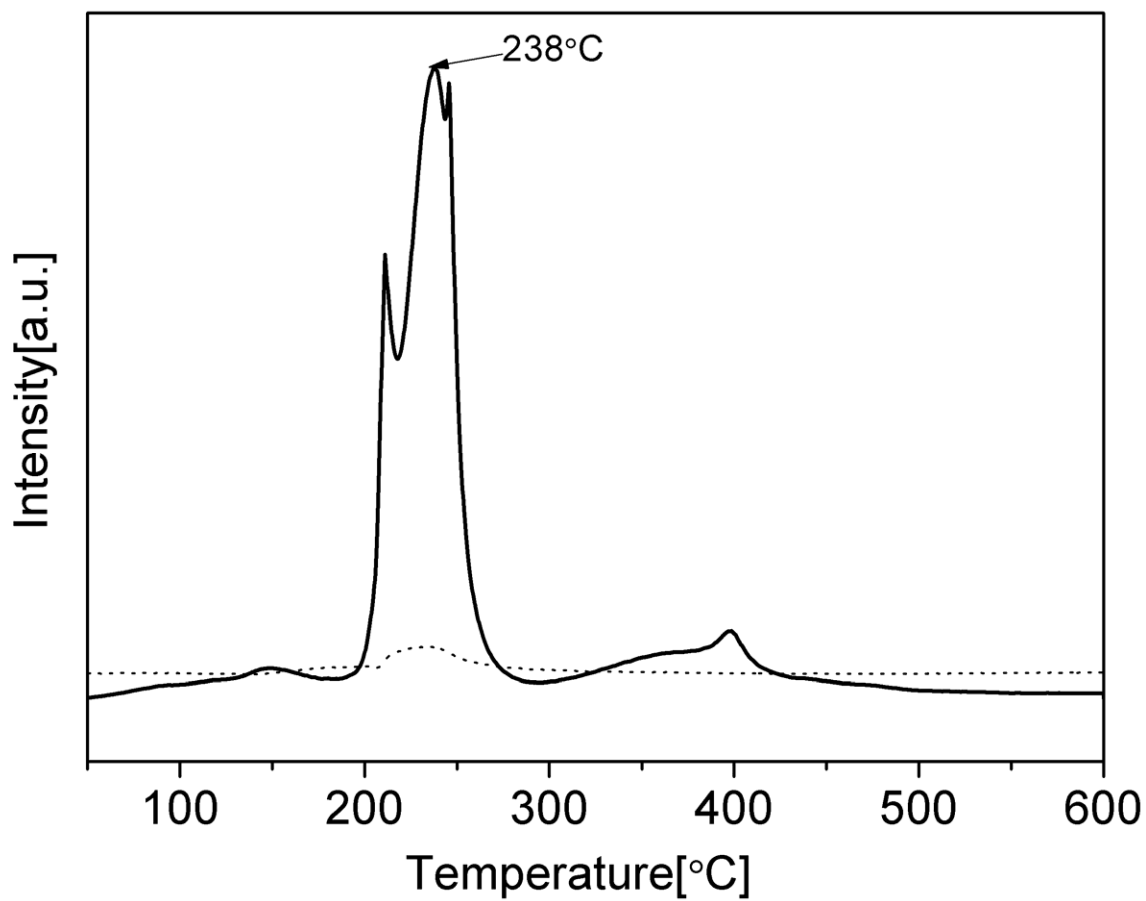

**Figure S8.** The H<sub>2</sub> (—) and NH<sub>3</sub> (---) MS signal of NaBH<sub>4</sub>---Mg(NH<sub>3</sub>)Cl<sub>2</sub>.
